# Supplementary material for: Neuregulin 4 mediates the metabolic benefits of mild cold exposure by promoting beige fat thermogenesis
Source: JCI journal article supplement (doi:10.1172/jci.insight.172957), 2023-11-28
Supplement: sd1 [file 1]

Supplemental Table S1.

| <b>Table S1. List of qPCR primers.</b> |             |                         |                         |
|----------------------------------------|-------------|-------------------------|-------------------------|
| <b>Species</b>                         | <b>Gene</b> | <b>Forward</b>          | <b>Reverse</b>          |
| Mouse                                  | Ucp1        | CTCTACGACTCAGTCCAAGAG   | CATTAAGCCGGCTGAGATCTTG  |
| Mouse                                  | Nrg4        | CCAGTTCAGTCCAGTGTGAG    | GACTGCCATAGAAATGATGG    |
| Mouse                                  | Fasn        | GGTTACACTGTGCTAGGTGTTG  | TCCAGGCCGCATGAGGCTCAGC  |
| Mouse                                  | Dio2        | gatgctcccaattccagtgt    | tgaaccaaagttgaccacca    |
| Mouse                                  | Prdm16      | CGGAAGAGCGTGAGTACAAATG  | TCCGTGAACACCTTGACACAGT  |
| Mouse                                  | Cox7a1      | GTCTCCAGGCTCTGGTCCG     | CTGTACAGGACGTTGTCCATTC  |
| Mouse                                  | Ppargc1a    | AGCCGTGACCACTGACAACGAG  | GCTGCATGGTTCTGAGTGCTAAG |
| Mouse                                  | Cidea       | GCAGCCTGCAGGAACTTATCAGC | GATCATGAAATGCGTGTTGTCC  |

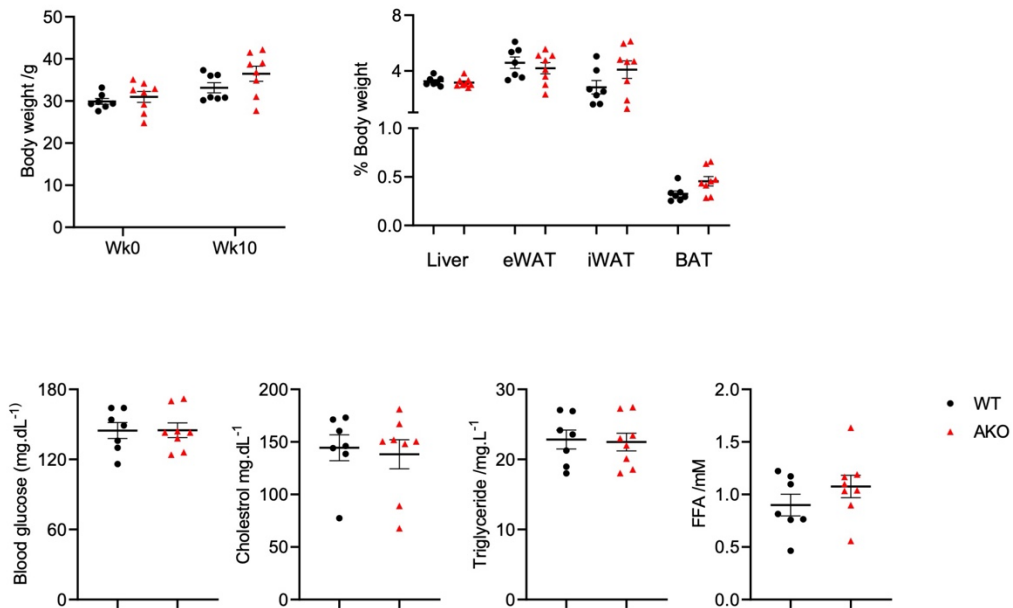

**Figure S1 Metabolic parameters of HFD-fed WT and AKO mice.**

WT (n=7) and AKO (n=8) mice were maintained on HFD at 16°C for a total of 10 weeks. Body weight, tissue/body weight ratio, and plasma metabolic parameters were indicated.

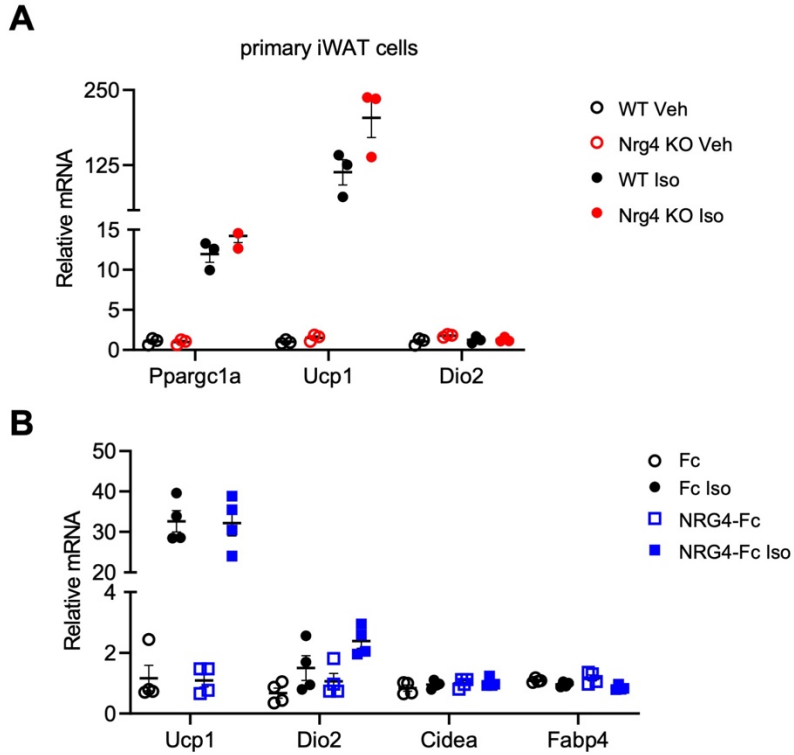

**Figure S2 Effects of NRG4 on adipocyte thermogenic response.**

qPCR analysis of gene expression. (A) Primary iWAT stromal/vascular cells were subjected to adipocyte differentiation followed by treatments with vehicle or isoproterenol (Iso, 200 nM) for six hours. (B) C3H 10T1/2 progenitor cells were subjected to beige adipocyte differentiation in the presence of Fc or NRG4-Fc (100 nM) followed by treatments with vehicle or isoproterenol (Iso, 200 nM) for six hours.
